# Supplementary material
Source: PubMed Central journal article supplement (PMC3272153)
Supplement: NIHMS344846-supplement-1.pdf [file NIHMS344846-supplement-1.pdf]

**Liang et al**

**Supplemental Table 1.**

Listed below are the numbers of male and female samples for each genotype at each age used in the analyses of biomechanical and geometric properties. After body weight adjustment, no apparent gender effect was observed at 1 month of age.

| <b>Age</b> | <b>Male</b>  | <b>Female</b> |
|------------|--------------|---------------|
| 1 month    | WT, 6; TG, 4 | WT, 3; TG, 5  |
| 2 months   | 0            | WT, 5; TG, 6  |
| 4 months   | 0            | WT, 3; TG, 4  |
| 6 months   | WT, 4; TG, 6 | 0             |

For Peer Review
